# Supplementary material
Source: PubMed Central journal article supplement (PMC5833601)
Supplement: jamaophthalmol-136-3-s001.pdf [file jamaophthalmol-136-3-s001.pdf]

## Supplementary Online Content

Tseng VL, Chlebowski RT, Yu F, et al. Association of cataract surgery with mortality in older women: findings from the Women's Health Initiative. *JAMA Ophthalmol*. Published online October 26, 2017. doi:10.1001/jamaophthalmol.2017.4512

**eTable 1.** *International Classification of Diseases, 9th Revision, Clinical Modification (ICD-9-CM) and Current Procedural Terminology (CPT) Codes Included in Definition of Cataract and Related Procedures*

**eTable 2.** Diseases Included in Mortality Attributed to Specific Systemic Conditions

**eTable 3.** *International Classification of Diseases, 9th Revision, Clinical Modification (ICD-9-CM) Codes Included in the Definition of Comorbidities*

**eTable 4.** Systemic and Ocular Comorbidities Collected within the Women's Health Initiative (WHI) and Medicare Databases

**eTable 5.** Baseline Characteristics of Patients With Cataract in the Women's Health Initiative from 1993-2013 (n=74 044)

**eTable 6.** Source of Diagnosis for Selected Systemic Comorbidities Dually Assessed in the Women's Health Initiative (WHI) and Medicare Databases

This supplementary material has been provided by the authors to give readers additional information about their work.

**eTable 1. International Classification of Diseases-9th Revision-Clinical Modification (ICD-9-CM) and Current Procedural Terminology (CPT) Codes Included in Definition of Cataract and Related Procedures**

| <b>Condition</b>                                               | <b>Eligible ICD-9 Diagnosis Code</b>     |
|----------------------------------------------------------------|------------------------------------------|
| Cataract                                                       | 366.x                                    |
| Pseudophakia                                                   | V43.1                                    |
| Severe cataract                                                | 366.13,14,17,18,19                       |
| <b>Procedure</b>                                               | <b>Eligible CPT Code</b>                 |
| Simple cataract surgery                                        | 66984                                    |
| Complex cataract surgery                                       | 66982                                    |
| Secondary cataract removal                                     | 66830                                    |
| Removal of lens material                                       | 66840, 66850, 66852, 66920, 66930, 66940 |
| Intracapsular cataract surgery                                 | 66983                                    |
| <b>Procedure</b>                                               | <b>Eligible ICD-9 Procedure Code</b>     |
| Insertion of intraocular lens                                  | 13.71                                    |
| Phacoemulsification and aspiration of cataract                 | 13.41                                    |
| Mechanical phacofragmentation and other aspiration of cataract | 13.43                                    |
| Other cataract extraction                                      | 13.69                                    |
| Intracapsular cataract surgery                                 | 13.19                                    |

**eTable 2. Diseases Included in Mortality Attributed to Specific Systemic Conditions**

| <b>Type of Mortality</b> | <b>Included Diseases</b>                                                                                                                                                                                                                                                                                                                                                                                                                                                                                                                                                                                                                                                                                                                                                                                                                                                                                                                                                                                                                                                                                                                                     |
|--------------------------|--------------------------------------------------------------------------------------------------------------------------------------------------------------------------------------------------------------------------------------------------------------------------------------------------------------------------------------------------------------------------------------------------------------------------------------------------------------------------------------------------------------------------------------------------------------------------------------------------------------------------------------------------------------------------------------------------------------------------------------------------------------------------------------------------------------------------------------------------------------------------------------------------------------------------------------------------------------------------------------------------------------------------------------------------------------------------------------------------------------------------------------------------------------|
| Vascular death           | Definite coronary heart disease, cerebrovascular disease, pulmonary embolism, possible coronary heart disease, other cardiovascular disease, unknown cardiovascular disease                                                                                                                                                                                                                                                                                                                                                                                                                                                                                                                                                                                                                                                                                                                                                                                                                                                                                                                                                                                  |
| Cancer death             | Breast cancer, ovarian cancer, endometrial cancer, colon cancer, rectosigmoid cancer, rectum cancer, uterine cancer, other cancer death, unknown cancer site, lung cancer, non-Hodgkin's lymphoma, leukemia, brain cancer, multiple myeloma, accessory sinus cancer, adrenal gland cancer, anal cancer, appendix cancer, biliary tract cancer, bladder cancer, bone-limb cancer, bone non-limb cancer, central nervous system cancer, cervical cancer, connective tissue cancer, endocrine gland cancer, esophageal cancer, eye and adnexal cancer, gall bladder cancer, genital organ cancer, gum cancer, heart cancer, hypopharynx cancer, kidney cancer, larynx cancer, liver cancer, lymph node cancer, Hodgkin's lymphoma, melanoma, meninges cancer, nasopharynx cancer, oral cancer, oropharynx cancer, other digestive cancer, other lip cancer, palate cancer, parotid gland cancer, peripheral nerve cancer, peritoneum cancer, renal pelvis cancer, salivary gland cancer, small intestine cancer, stomach cancer, thymus cancer, thyroid cancer, tongue cancer, tonsil cancer, ureter cancer, urinary organ cancer, vaginal cancer, vulva cancer |
| Accident-related death   | Accident                                                                                                                                                                                                                                                                                                                                                                                                                                                                                                                                                                                                                                                                                                                                                                                                                                                                                                                                                                                                                                                                                                                                                     |
| Neurologic death         | Alzheimer's disease, amyotrophic lateral sclerosis, Parkinson's disease                                                                                                                                                                                                                                                                                                                                                                                                                                                                                                                                                                                                                                                                                                                                                                                                                                                                                                                                                                                                                                                                                      |
| Pulmonary death          | Chronic obstructive pulmonary disease, pulmonary fibrosis                                                                                                                                                                                                                                                                                                                                                                                                                                                                                                                                                                                                                                                                                                                                                                                                                                                                                                                                                                                                                                                                                                    |
| Infection-related death  | Pneumonia, sepsis                                                                                                                                                                                                                                                                                                                                                                                                                                                                                                                                                                                                                                                                                                                                                                                                                                                                                                                                                                                                                                                                                                                                            |

**eTable 3. International Classification of Diseases, 9th Revision, Clinical Modification (ICD-9-CM) Codes Included in the Definition of Comorbidities**

| <b>Comorbidity</b>                               | <b>Eligible ICD-9 Codes</b>                   |
|--------------------------------------------------|-----------------------------------------------|
| Myocardial Infarction                            | 410-412.x                                     |
| Congestive Heart Failure                         | 398.91, 402.x, 404.x, 428.x                   |
| Peripheral Vascular Disease                      | 440.24, 443.81, 443.89, 443.9, 785.4          |
| Cerebrovascular Disease                          | 430-438.x,                                    |
| Dementia                                         | 290.x, 291.2, 292.82, 294.1, 294.8            |
| Chronic Pulmonary Disease                        | 490-496.x, 500-505.x, 506.4, 508.1            |
| Rheumatologic Disease                            | 710.x, 714.x, 720.x, 725.x                    |
| Peptic Ulcer Disease                             | 531-534.x                                     |
| Cirrhosis                                        | 571.x                                         |
| Hepatic Failure                                  | 070.x, 456.x, 570.x, 572.x                    |
| Immunosuppression                                | 279.9                                         |
| Diabetes Mellitus                                | 250.0-3x, 250.8-9x                            |
| Diabetes Mellitus w/ Complications               | 250.4-7x                                      |
| Hemi/Paraplegia                                  | 342-344.x                                     |
| Chronic Renal Disease                            | 403-404.x, 582-583.x, 585-586.x, 588.x, 593.9 |
| Malignant Neoplasms                              | 140-172.x, 174-176.x 179-195.x                |
| Multiple Myeloma/Leukemia                        | 203, 204, 205, 206,207,207208                 |
| Lymphomas                                        | 200-202.x                                     |
| Metastatic Solid Tumor                           | 196-198.x, 199.0-1x                           |
| AIDS                                             | 042-043.x                                     |
| Glaucoma                                         | 365.x                                         |
| Diabetes Mellitus with Ophthalmic Manifestations | 250.5x, 362.0x                                |
| Age-Related Macular Degeneration                 | 362.50-52                                     |

**eTable 4. Systemic and Ocular Comorbidities Collected within the Women's Health Initiative (WHI) and Medicare Databases**

| <b>Comorbidity</b>                               | <b>Available in WHI</b> | <b>Available in Medicare</b> |
|--------------------------------------------------|-------------------------|------------------------------|
| Myocardial Infarction                            | X                       | X                            |
| Congestive Heart Failure                         | X                       | X                            |
| Peripheral Vascular Disease                      | X                       | X                            |
| Cerebrovascular Disease                          | X                       | X                            |
| Dementia                                         |                         | X                            |
| Chronic Pulmonary Disease                        | X                       | X                            |
| Rheumatologic Disease                            | X                       | X                            |
| Peptic Ulcer Disease                             | X                       | X                            |
| Cirrhosis                                        |                         | X                            |
| Hepatic Failure                                  |                         | X                            |
| Immunosuppression                                | X                       | X                            |
| Diabetes Mellitus                                |                         | X                            |
| Diabetes Mellitus w/ Complications               |                         | X                            |
| Hemi/Paraplegia                                  |                         | X                            |
| Chronic Renal Disease                            |                         | X                            |
| Malignant Neoplasms                              | X                       | X                            |
| Multiple Myeloma/Leukemia                        | X                       | X                            |
| Lymphomas                                        | X                       | X                            |
| Metastatic Solid Tumor                           |                         | X                            |
| AIDS                                             |                         | X                            |
| Glaucoma                                         |                         | X                            |
| Diabetes Mellitus with Ophthalmic Manifestations |                         | X                            |
| Age-Related Macular Degeneration                 |                         | X                            |

**eTable 5. Baseline Characteristics of Patients With Cataract in the Women's Health Initiative from 1993-2013 (n=74,044)**

|                                                                                           | <b>Surgery Group (n=41,735)</b>    |                                      | <b>Non-surgery Group (n=32,309)</b> |
|-------------------------------------------------------------------------------------------|------------------------------------|--------------------------------------|-------------------------------------|
| <b>Age at Time of Cataract Diagnosis (Years)</b>                                          |                                    |                                      |                                     |
| 65-69                                                                                     | 19,035 (45.6)                      |                                      | 17,948 (55.6)                       |
| 70-74                                                                                     | 14,642 (35.1)                      |                                      | 9,241 (28.6)                        |
| 75-79                                                                                     | 6,826 (16.4)                       |                                      | 3,963 (12.3)                        |
| 80-84                                                                                     | 1,095 (2.6)                        |                                      | 927 (2.9)                           |
| ≥85                                                                                       | 137 (0.3)                          |                                      | 230 (0.7)                           |
| <b>WHI Study Arm</b>                                                                      |                                    |                                      |                                     |
| Clinical Trial                                                                            | 17,719 (42.5)                      |                                      | 14,138 (43.8)                       |
| Observational Study                                                                       | 24,016 (57.5)                      |                                      | 18,171 (56.2)                       |
| <b>Race</b>                                                                               |                                    |                                      |                                     |
| White                                                                                     | 36,992 (88.9)                      |                                      | 27,438 (85.1)                       |
| Black/African American                                                                    | 2,495 (6.0)                        |                                      | 2,798 (8.7)                         |
| Asian/Pacific Islander                                                                    | 798 (1.9)                          |                                      | 712 (2.2)                           |
| Hispanic/Latino                                                                           | 855 (2.1)                          |                                      | 868 (2.7)                           |
| American Indian/Alaskan Native                                                            | 122 (0.3)                          |                                      | 110 (0.3)                           |
| Other                                                                                     | 368 (0.9)                          |                                      | 306 (1.0)                           |
| Unknown                                                                                   | 105 (0.2)                          |                                      | 77 (0.2)                            |
| <b>Region of United States Residence</b>                                                  |                                    |                                      |                                     |
| Northeast                                                                                 | 9,610 (23.0)                       |                                      | 8,585 (26.6)                        |
| West                                                                                      | 8,807 (21.1)                       |                                      | 6,621 (20.5)                        |
| Midwest                                                                                   | 10,682 (25.6)                      |                                      | 8,509 (26.3)                        |
| South                                                                                     | 12,636 (30.3)                      |                                      | 8,594 (26.6)                        |
| <b>Education Level</b>                                                                    |                                    |                                      |                                     |
| High School or Less <sup>a</sup>                                                          | 9,504 (22.8)                       |                                      | 6,767 (20.9)                        |
| More than High School <sup>b</sup>                                                        | 32,041 (76.8)                      |                                      | 25,379 (78.6)                       |
| Unknown                                                                                   | 190 (0.5)                          |                                      | 163 (0.5)                           |
| <b>Annual Income</b>                                                                      |                                    |                                      |                                     |
| <\$50,000                                                                                 | 24,867 (59.6)                      |                                      | 17,296 (53.5)                       |
| ≥\$50,000                                                                                 | 15,241 (36.5)                      |                                      | 13,820 (42.8)                       |
| Unknown                                                                                   | 1,627 (3.9)                        |                                      | 1,193 (3.7)                         |
| <b>Health Insurance at WHI Study Baseline</b>                                             |                                    |                                      |                                     |
| No Insurance                                                                              | 1,046 (2.5)                        |                                      | 1,145 (3.5)                         |
| Medicare or MediCal Only                                                                  | 4,307 (10.3)                       |                                      | 2,517 (7.8)                         |
| Private, Health Maintenance Organization (HMO), Military, or Other Insurance <sup>c</sup> | 36,382 (87.2)                      |                                      | 28,647 (88.7)                       |
| <b>Utilization of Health Prevention Services</b>                                          |                                    |                                      |                                     |
| Mammogram                                                                                 | 40,324 (96.7)                      |                                      | 31,141 (96.3)                       |
| Pap Smear                                                                                 | 38,070 (91.2)                      |                                      | 29,571 (91.5)                       |
| <b>Charlson Comorbidity Index (CCI) Score</b>                                             |                                    |                                      |                                     |
|                                                                                           | <b>At Time of Cataract Surgery</b> | <b>At Time of Cataract Diagnosis</b> |                                     |
| 0                                                                                         | 7,797 (18.7)                       | 14,673 (35.2)                        | 11,925 (36.9)                       |
| 1-2                                                                                       | 15,122 (36.2)                      | 17,016 (40.8)                        | 12,728 (39.4)                       |
| 3-4                                                                                       | 10,241 (24.5)                      | 7,187 (17.2)                         | 5,032 (15.6)                        |
| ≥5                                                                                        | 8,575 (20.6)                       | 2,859 (6.9)                          | 2,624 (8.1)                         |
| <b>Systemic Comorbidities in the CCI</b>                                                  |                                    |                                      |                                     |
|                                                                                           | <b>At Time of Cataract Surgery</b> | <b>At Time of Cataract Diagnosis</b> |                                     |
| Myocardial Infarction                                                                     | 4,777 (11.5)                       | 4,043 (9.7)                          | 2,228 (6.9)                         |
| Congestive Heart Failure                                                                  | 6,734 (16.1)                       | 2,993 (7.2)                          | 2,367 (7.3)                         |
| Peripheral Vascular Disease                                                               | 10,499 (25.2)                      | 4,395 (10.5)                         | 3,782 (11.7)                        |
| Cerebrovascular Disease                                                                   | 11,946 (28.6)                      | 4,719 (11.3)                         | 4,225 (13.1)                        |
| Dementia                                                                                  | 1,222 (2.9)                        | 259 (0.6)                            | 515 (1.6)                           |
| Chronic Pulmonary Disease <sup>d</sup>                                                    | 15,238 (36.5)                      | 8,948 (21.4)                         | 6,511 (20.2)                        |
| Chronic Renal Disease                                                                     | 2,300 (5.5)                        | 618 (1.5)                            | 773 (2.4)                           |
| Connective Tissue Disease                                                                 | 5,668 (13.6)                       | 2,791 (6.7)                          | 2,072 (6.4)                         |

|                                                   |               |               |               |
|---------------------------------------------------|---------------|---------------|---------------|
| Peptic Ulcer Disease                              | 5,008 (12.0)  | 3,944 (9.5)   | 2,595 (8.0)   |
| Diabetes Mellitus (DM) Without Complications      | 10,610 (25.4) | 5,416 (13.0)  | 5,069 (15.7)  |
| DM With Complications                             | 200 (0.5)     | 127 (0.3)     | 118 (0.4)     |
| Hemiplegia                                        | 916 (2.2)     | 404 (1.0)     | 317 (1.0)     |
| Leukemia/Multiple Myeloma                         | 517 (1.2)     | 279 (0.7)     | 252 (0.8)     |
| Lymphoma                                          | 714 (1.7)     | 432 (1.0)     | 329 (1.0)     |
| Solid Malignant Neoplasm                          | 12,472 (29.9) | 11,202 (26.8) | 7,616 (23.6)  |
| Metastatic Solid Malignant Neoplasm               | 1,422 (3.4)   | 608 (1.5)     | 672 (2.1)     |
| Mild Liver Disease                                | 4,142 (9.9)   | 1,569 (3.8)   | 1,732 (5.4)   |
| Moderate/Severe Liver Disease                     | 81 (0.2)      | 34 (0.1)      | 23 (0.1)      |
| Acquired Immune Deficiency Syndrome               | 53 (0.1)      | 23 (0.0)      | 16 (0.1)      |
| <b>Ocular Comorbidities</b>                       |               |               |               |
| Age-Related Macular Degeneration                  | 10,993 (26.3) |               | 3,702 (11.5)  |
| Glaucoma                                          | 13,173 (31.6) |               | 5,639 (17.5)  |
| Severe Cataract <sup>e</sup>                      | 18,611 (44.6) |               | 2,470 (7.6)   |
| <b>Smoking Status</b>                             |               |               |               |
| Never smoker                                      | 21,206 (50.8) |               | 16,534 (51.2) |
| Past smoker                                       | 17,676 (42.3) |               | 13,487 (41.7) |
| Current smoker                                    | 2,312 (5.5)   |               | 1,910 (5.9)   |
| Unknown                                           | 541 (1.3)     |               | 378 (1.2)     |
| <b>Alcohol Intake</b>                             |               |               |               |
| Non-Drinker                                       | 4,747 (11.4)  |               | 3,395 (10.5)  |
| Past Drinker                                      | 7,533 (18.0)  |               | 5,485 (17.0)  |
| <1 Drink Per Month                                | 4,807 (11.5)  |               | 3,884 (12.0)  |
| <1 Drink Per Week                                 | 8,419 (20.2)  |               | 6,712 (20.8)  |
| 1 to <7 Drinks Per Week                           | 10,709 (25.6) |               | 8,703 (26.9)  |
| 7+ Drinks Per Week                                | 5,225 (12.5)  |               | 3,905 (12.1)  |
| Unknown                                           | 295 (0.7)     |               | 225 (0.7)     |
| <b>Body Mass Index</b>                            |               |               |               |
| <25                                               | 15,104 (36.2) |               | 11,856 (36.7) |
| 25-29                                             | 12,537 (30.0) |               | 9,364 (29.0)  |
| >29                                               | 14,094 (33.8) |               | 11,089 (34.3) |
| <b>Metabolic Equivalent Tasks (METs) Per Week</b> |               |               |               |
| 0                                                 | 5,867 (14.0)  |               | 4,587 (14.2)  |
| 1-4                                               | 8,091 (19.3)  |               | 6,326 (19.6)  |
| 5-12                                              | 25,726 (61.6) |               | 19,811 (61.3) |
| Unknown                                           | 2,051 (4.9)   |               | 1,585 (4.9)   |

<sup>a</sup> Includes no school, 1-4 years of grade school, 5-8 years of grade school, some high school, high school diploma or GED

<sup>b</sup> Includes vocational/training school, some college/associate degree, college graduate/baccalaureate degree, some post-graduate or professional, master's degree, doctoral degree

<sup>c</sup> Includes individuals who also have simultaneous Medicare or MediCal coverage

<sup>d</sup> Includes chronic bronchitis, emphysema, asthma, bronchiectasis, alveolitis, chronic airway obstruction, pneumoconioses, and asbestosis

<sup>e</sup> Includes anterior and posterior subcapsular cataracts, total/mature cataract, hypermature cataract, combined forms of cataract.

**eTable 6. Source of Diagnosis for Selected Systemic Comorbidities Dually Assessed in the Women’s Health Initiative (WHI) and Medicare Databases**

| <b>Comorbidity</b>                 | <b>Number (%)<br/>Diagnosed in<br/>WHI Only</b> | <b>Number (%)<br/>Diagnosed in<br/>Medicare Only</b> | <b>Number (%)<br/>Diagnosed in Both<br/>WHI and Medicare</b> | <b>P Value</b> |
|------------------------------------|-------------------------------------------------|------------------------------------------------------|--------------------------------------------------------------|----------------|
| Myocardial Infarction (n=7,005)    | 3,632 (51.8)                                    | 1,907 (27.2)                                         | 1,466 (20.9)                                                 | <.0001         |
| Congestive Heart Failure (n=9,101) | 402 (4.4)                                       | 7,542 (82.9)                                         | 1,157 (12.7)                                                 | <.0001         |
| Cerebrovascular Disease (n=16,171) | 85 (0.5)                                        | 15,090 (93.3)                                        | 996 (6.2)                                                    | <.0001         |
| Solid Malignant Neoplasm (20,088)  | 8,182 (40.7)                                    | 3,716 (18.5)                                         | 8,190 (40.8)                                                 | <.001          |
